# Supplementary material for: DNA methylation in blood—Potential to provide new insights into cell biology
Source: PLoS One. 2020 Nov 4;15(11):e0241367. doi: 10.1371/journal.pone.0241367 (PMC7641429; doi:10.1371/journal.pone.0241367)
Supplement: S3 Table — (CSV) [file pone.0241367.s003.csv]

variables	group1	group2	n1	n2	statistic	df	p	p.adj	p.adj.signif
CD19	CD14	CD19	12	12	15.6996706720418	13.5929015466036	4.23e-10	3.102e-09	****
CD19	CD14	CD4	12	12	1.28738298928526	19.4530243403379	0.213	0.26625	ns
CD19	CD14	CD56	12	12	-2.78548004174445	13.759280904179	0.015	0.0232394366197183	*
CD19	CD14	CD8	12	12	-2.1125138422498	16.9546308596462	0.05	0.0714285714285714	ns
CD19	CD19	CD4	12	12	-17.2179940751701	16.9847171565152	3.46e-12	4.22888888888889e-11	****
CD19	CD19	CD56	12	12	-32.8055158253799	21.987422307809	3.61e-20	3.971e-18	****
CD19	CD19	CD8	12	12	-25.8702725388369	19.4978844941219	1.46e-16	8.03e-15	****
CD19	CD4	CD56	12	12	-5.19043216841351	17.227681613889	7.07e-05	0.000152490196078431	***
CD19	CD4	CD8	12	12	-4.10926894142125	20.8953258003344	0.000505	0.000991964285714286	***
CD19	CD56	CD8	12	12	0.7247986798333	19.75390446189	0.477	0.5247	ns
CD248	CD14	CD19	12	12	0.501866300473473	1.8967369637737	0.668	0.706538461538462	ns
CD248	CD14	CD4	12	12	5.67663935698679	1.04703438585794	0.103	0.137831325301205	ns
CD248	CD14	CD56	12	12	0.570268451172725	1.40484266305931	0.646	0.689902912621359	ns
CD248	CD14	CD8	12	12	7.22532874213792	1.08454575648092	0.075	0.104430379746835	ns
CD248	CD19	CD4	12	12	6.35474908283712	1.07613946162969	0.088	0.121	ns
CD248	CD19	CD56	12	12	-0.018682270827147	1.66815841424704	0.987	0.99605504587156	ns
CD248	CD19	CD8	12	12	8.27020280402566	1.1375055934244	0.059	0.0832051282051282	ns
CD248	CD4	CD56	12	12	-11.0704357574209	5.00909615606544	0.000104	0.00022	***
CD248	CD4	CD8	12	12	6.41030238926841	20.3859619907025	2.72e-06	8.525e-06	****
CD248	CD56	CD8	12	12	14.0130584677322	5.83050857300159	1.04e-05	2.86e-05	****
CD40	CD14	CD19	12	12	2.71125452010547	21.9623742713726	0.013	0.0204285714285714	*
CD40	CD14	CD4	12	12	14.1910158056502	11.7713931063405	9.21e-09	5.0655e-08	****
CD40	CD14	CD56	12	12	2.16877477216243	21.9152034469677	0.041	0.0617808219178082	ns
CD40	CD14	CD8	12	12	8.79120949700147	15.0839025209442	2.53e-07	9.46e-07	****
CD40	CD19	CD4	12	12	9.93565367513828	11.7102075972999	4.71e-07	1.67129032258065e-06	****
CD40	CD19	CD56	12	12	-0.670028610269545	21.7675927311401	0.51	0.555445544554455	ns
CD40	CD19	CD8	12	12	5.02621438578322	14.7798898464086	0.000157	0.000318	***
CD40	CD4	CD56	12	12	-11.9630893522579	11.8734214318764	5.58e-08	2.4552e-07	****
CD40	CD4	CD8	12	12	-10.14009713932	14.8828098664603	4.48e-08	2.14260869565217e-07	****
CD40	CD56	CD8	12	12	6.38782984762572	15.5793710073373	1.02e-05	2.86e-05	****
CD8A	CD14	CD19	12	12	-2.88372994740742	17.0143542947945	0.01	0.0161764705882353	*
CD8A	CD14	CD4	12	12	-1.07655421483919	21.9831620408038	0.293	0.345212765957447	ns
CD8A	CD14	CD56	12	12	6.1227494402658	15.4958954939712	1.69e-05	4.04130434782609e-05	****
CD8A	CD14	CD8	12	12	12.2858513070832	11.6386035138736	5.12e-08	2.34666666666667e-07	****
CD8A	CD19	CD4	12	12	2.13045676726864	17.2967491574643	0.048	0.0694736842105263	ns
CD8A	CD19	CD56	12	12	6.75317193674069	12.3933947968448	1.73e-05	4.04893617021277e-05	****
CD8A	CD19	CD8	12	12	10.0404153203504	11.1901883533389	6.16e-07	2.1175e-06	****
CD8A	CD4	CD56	12	12	7.35375933837093	15.2733035240058	2.15e-06	6.95588235294118e-06	****
CD8A	CD4	CD8	12	12	13.4411172594197	11.6042611742788	1.98e-08	9.9e-08	****
CD8A	CD56	CD8	12	12	11.6051865502995	13.9366909114726	1.51e-08	7.90952380952381e-08	****
DCP2	CD14	CD19	12	12	-0.353761144983022	9.8710223271874	0.731	0.765809523809524	ns
DCP2	CD14	CD4	12	12	11.4595427375342	5.48976044270184	4.85e-05	0.000111145833333333	***
DCP2	CD14	CD56	12	12	3.25473752441685	8.23752125970321	0.011	0.017536231884058	*
DCP2	CD14	CD8	12	12	2.43434990193072	7.90784310620187	0.041	0.0617808219178082	ns
DCP2	CD19	CD4	12	12	16.6472604802332	11.9841708287977	1.2e-09	7.95882352941177e-09	****
DCP2	CD19	CD56	12	12	4.65779673079478	19.610134177196	0.000159	0.000318	***
DCP2	CD19	CD8	12	12	3.64073301556886	19.083859094626	0.002	0.00354838709677419	**
DCP2	CD4	CD56	12	12	-13.3443591667777	14.3363893292444	1.76e-09	1.02473684210526e-08	****
DCP2	CD4	CD8	12	12	-15.6749777897157	14.6944840916698	1.41e-10	1.10785714285714e-09	****
DCP2	CD56	CD8	12	12	-1.26597406718087	21.9366389052366	0.219	0.270674157303371	ns
FAR1	CD14	CD19	12	12	-0.936449590752962	16.6802421023253	0.362	0.406326530612245	ns
FAR1	CD14	CD4	12	12	-3.8321878611782	14.4778697362882	0.002	0.00354838709677419	**
FAR1	CD14	CD56	12	12	1.78751823389611	18.325431074244	0.09	0.122222222222222	ns
FAR1	CD14	CD8	12	12	1.04188263358757	17.0735055456674	0.312	0.356082474226804	ns
FAR1	CD19	CD4	12	12	-4.63002886239659	20.574537146066	0.000151	0.000313396226415094	***
FAR1	CD19	CD56	12	12	3.89048000004002	21.4738799271853	0.000816	0.00154758620689655	**
FAR1	CD19	CD8	12	12	2.95250875430915	21.9655967794698	0.007	0.0114925373134328	*
FAR1	CD4	CD56	12	12	8.4525145753962	18.9244616514917	7.56e-08	3.09222222222222e-07	****
FAR1	CD4	CD8	12	12	7.81529565132202	20.1871470602443	1.57e-07	6.16785714285714e-07	****
FAR1	CD56	CD8	12	12	-1.10453668680137	21.6994949002661	0.281	0.335978260869565	ns
KLRB1	CD14	CD19	12	12	-1.70654178512169	19.0828868104921	0.104	0.137831325301205	ns
KLRB1	CD14	CD4	12	12	7.62617112034108	12.138403741167	5.71e-06	1.69756756756757e-05	****
KLRB1	CD14	CD56	12	12	10.7979354777574	11.3495964228409	2.58e-07	9.46e-07	****
KLRB1	CD14	CD8	12	12	7.3644521580776	14.5738835153471	2.79e-06	8.525e-06	****
KLRB1	CD19	CD4	12	12	7.14107801651047	11.4995171816345	1.49e-05	3.725e-05	****
KLRB1	CD19	CD56	12	12	9.21575566494301	11.1530968545144	1.5e-06	5e-06	****
KLRB1	CD19	CD8	12	12	7.0570309065085	12.5998494373743	1.02e-05	2.86e-05	****
KLRB1	CD4	CD56	12	12	11.7609235199436	17.1613865676922	1.23e-09	7.95882352941177e-09	****
KLRB1	CD4	CD8	12	12	0.286579151285381	17.2341004775941	0.778	0.807358490566038	ns
KLRB1	CD56	CD8	12	12	-6.84653468410435	13.075383023559	1.14e-05	3.05853658536585e-05	****
PARK2	CD14	CD19	12	12	3.56056399745066	2.65836219971336	0.046	0.0674666666666667	ns
PARK2	CD14	CD4	12	12	18.1673135082229	16.6128172947307	2.16e-12	2.97e-11	****
PARK2	CD14	CD56	12	12	5.643596502007	14.1607749148452	5.8e-05	0.0001276	***
PARK2	CD14	CD8	12	12	11.7967833396503	21.3400386139032	8.14e-11	6.88769230769231e-10	****
PARK2	CD19	CD4	12	12	4.17009941241571	2.17347333117754	0.046	0.0674666666666667	ns
PARK2	CD19	CD56	12	12	-1.38092467206631	2.11836668130332	0.295	0.345212765957447	ns
PARK2	CD19	CD8	12	12	2.12547139898371	2.45419586102391	0.143	0.185058823529412	ns
PARK2	CD4	CD56	12	12	-21.086370966676	13.6094884620874	8.71e-12	8.71e-11	****
PARK2	CD4	CD8	12	12	-5.18794495715661	18.4669374201297	5.72e-05	0.0001276	***
PARK2	CD56	CD8	12	12	9.78512020244669	14.7779191644192	7.59e-08	3.09222222222222e-07	****
POUF2	CD14	CD19	12	12	3.02458047077047	19.5992747094839	0.007	0.0114925373134328	*
POUF2	CD14	CD4	12	12	-1.23997765688918	15.2967934145205	0.234	0.282857142857143	ns
POUF2	CD14	CD56	12	12	-16.6898757629043	20.8914295140129	1.49e-13	2.65571428571429e-12	****
POUF2	CD14	CD8	12	12	-17.419971175995	19.8581070865675	1.69e-13	2.65571428571429e-12	****
POUF2	CD19	CD4	12	12	-4.4141977463626	13.1340075260401	0.000683	0.0013180701754386	**
POUF2	CD19	CD56	12	12	-16.1716024976568	17.0752225926354	8.69e-12	8.71e-11	****
POUF2	CD19	CD8	12	12	-16.6024056382199	16.0556624804821	1.56e-11	1.43e-10	****
POUF2	CD4	CD56	12	12	-21.8778032167629	17.4691238381355	3.87e-14	8.514e-13	****
POUF2	CD4	CD8	12	12	-23.7702999702489	18.6178786790792	2.18e-15	5.995e-14	****
POUF2	CD56	CD8	12	12	-0.0896589402705149	21.7551372390348	0.929	0.946203703703704	ns
SLC15A4	CD14	CD19	12	12	-1.35650559616262	1.95856287145404	0.31	0.356082474226804	ns
SLC15A4	CD14	CD4	12	12	0.00472007390652393	1.1184187460901	0.997	0.997	ns
SLC15A4	CD14	CD56	12	12	3.3167947536894	1.1309196606029	0.163	0.208488372093023	ns
SLC15A4	CD14	CD8	12	12	0.585247419810677	1.35888216355457	0.641	0.689902912621359	ns
SLC15A4	CD19	CD4	12	12	1.75917333509129	1.08778246175734	0.314	0.356082474226804	ns
SLC15A4	CD19	CD56	12	12	4.63819699668241	1.09698873487269	0.119	0.155833333333333	ns
SLC15A4	CD19	CD8	12	12	2.20509368467881	1.26323107464298	0.227	0.277444444444444	ns
SLC15A4	CD4	CD56	12	12	9.80548096384433	21.9476029642236	1.77e-09	1.02473684210526e-08	****
SLC15A4	CD4	CD8	12	12	1.32301344946976	17.7856820826554	0.203	0.256666666666667	ns
SLC15A4	CD56	CD8	12	12	-5.80376580526484	18.3146027147524	1.58e-05	3.86222222222222e-05	****
WIPI2	CD14	CD19	12	12	5.58179294978651	6.28410447829017	0.001	0.00186440677966102	**
WIPI2	CD14	CD4	12	12	13.5329635261333	2.46347922349141	0.002	0.00354838709677419	**
WIPI2	CD14	CD56	12	12	4.47477782796869	5.98822609967317	0.004	0.00698412698412698	**
WIPI2	CD14	CD8	12	12	1.04190965232635	2.87178569227803	0.377	0.418888888888889	ns
WIPI2	CD19	CD4	12	12	6.5446027659677	13.6800219252463	1.46e-05	3.725e-05	****
WIPI2	CD19	CD56	12	12	-0.10412989958492	8.18940561629284	0.92	0.945794392523364	ns
WIPI2	CD19	CD8	12	12	-6.24030549892238	15.7258112841898	1.28e-05	3.35238095238095e-05	****
WIPI2	CD4	CD56	12	12	-4.85107945718729	4.49625637207716	0.006	0.0103125	*
WIPI2	CD4	CD8	12	12	-23.4234584875476	20.270365975707	3.74e-16	1.37133333333333e-14	****
WIPI2	CD56	CD8	12	12	-4.47959400492525	4.91715029189468	0.007	0.0114925373134328	*
